# Supplementary material for: Acyclic cucurbit[n]uril conjugated dextran for drug encapsulation and bioimaging
Source: Royal Society of Chemistry journal article supplement (doi:10.1039/c7cc04535b), 2017-01-01
Supplement: c7cc04535b1.pdf [file c7cc04535b1.pdf]

## Supporting Information

### Table of Contents

|                                             |    |
|---------------------------------------------|----|
| General Experimental.....                   | 2  |
| Synthetic Procedures.....                   | 3  |
| Spectra for host-guest study.....           | 6  |
| Supplementary TEM image.....                | 16 |
| Method for quantum yield determination..... | 17 |
| Solid phase luminescence.....               | 18 |
| <i>In vitro</i> cytotoxicity assay.....     | 19 |
| Bioimaging by confocal microscopy.....      | 19 |
| References.....                             | 20 |

## General Experimental

All reagents and solvents were purchased from commercial suppliers and used without further purification. Container **2** was synthesized according to literature procedures<sup>1</sup>. <sup>1</sup>H NMR spectra were recorded on a Bruker AVANCE III HD (400 MHz). FT-IR spectra were recorded on a ThermoFisher Nicolet iS10 spectrometer. UV-Vis spectroscopy was recorded on a Cary 100 spectrometer (Agilent). The fluorescence spectroscopy was conducted on a RF-6000 fluorescence spectrometer (Shimadzu). Dynamic light scattering (DLS) and  $\zeta$ -potential were recorded on a Zetasizer Nano ZS instrument (Malvern). Transmission electron microscopy (TEM) was carried out on a Tecnai G2 F20 S-Twin (FEI) instrument. Elemental Analysis was performed on a Vario EL Elemental Analyzer (Analysemsysteme GmbH).

## Synthetic Procedures

Polymer **1**: container **2** (150 mg, 0.125 mmol) and dimethyl sulfoxide (10 mL) was heated at reflux for 5 h. After removing excess dimethyl sulfoxide by rotary evaporation, the residue was dried under high vacuum. A solution of dextran ( $M_w = 40K$ , 80 mg) and diisopropylethylamine (0.5 mL, 3 mmol) in DMSO (15 mL) was added and stirred at 50 °C for 8 h. The product was poured into water (80 mL) and dialyzed (MWCO 3500) against water. The residual solution was lyophilized to yield polymer **1** as a white solid (136 mg, 78%).

$^1H$  NMR (400 MHz, 20 mM  $NaD_2PO_4$ ): 6.83 (s, 4H), 5.65 (d,  $J = 14.6$  Hz, 2H), 5.55 (d,  $J = 15.6$  Hz, 4H), 5.48 (d,  $J = 8.4$  Hz, 2H), 5.46 (d,  $J = 8.4$  Hz, 2H), 5.35 (d,  $J = 16.0$  Hz, 4H), 4.97 (d,  $J = 2.4$  Hz, 9.8H), 4.50 (d,  $J = 15.6$  Hz, 4H), 4.38 (d,  $J = 15.6$  Hz, 4H), 4.26 (d,  $J = 15.6$  Hz, 4H), 4.29 (d,  $J = 15.6$  Hz, 4H), 4.16 (d,  $J = 14.6$  Hz, 2H), 3.99-3.89 (m, 19.6H), 3.75-3.68 (m, 19.6H), 3.58-3.48 (m, 19.6H), 1.80 (s, 6H), 1.76 (s, 6H).

FT-IR ( $cm^{-1}$ ): 3680m, 3400s, 1725s, 1617s, 1479s, 1450s, 1420s, 1016s, 806m.

Elemental Analysis  $(C_6H_{10}O_5)_{9.8}(C_{50}H_{50}N_{16}O_{19})_1(H_2O)_{39}$ : C 37.65%; H 6.56%; N 6.46%. Calculated: C 37.62%; H 6.52%; N 6.45%.

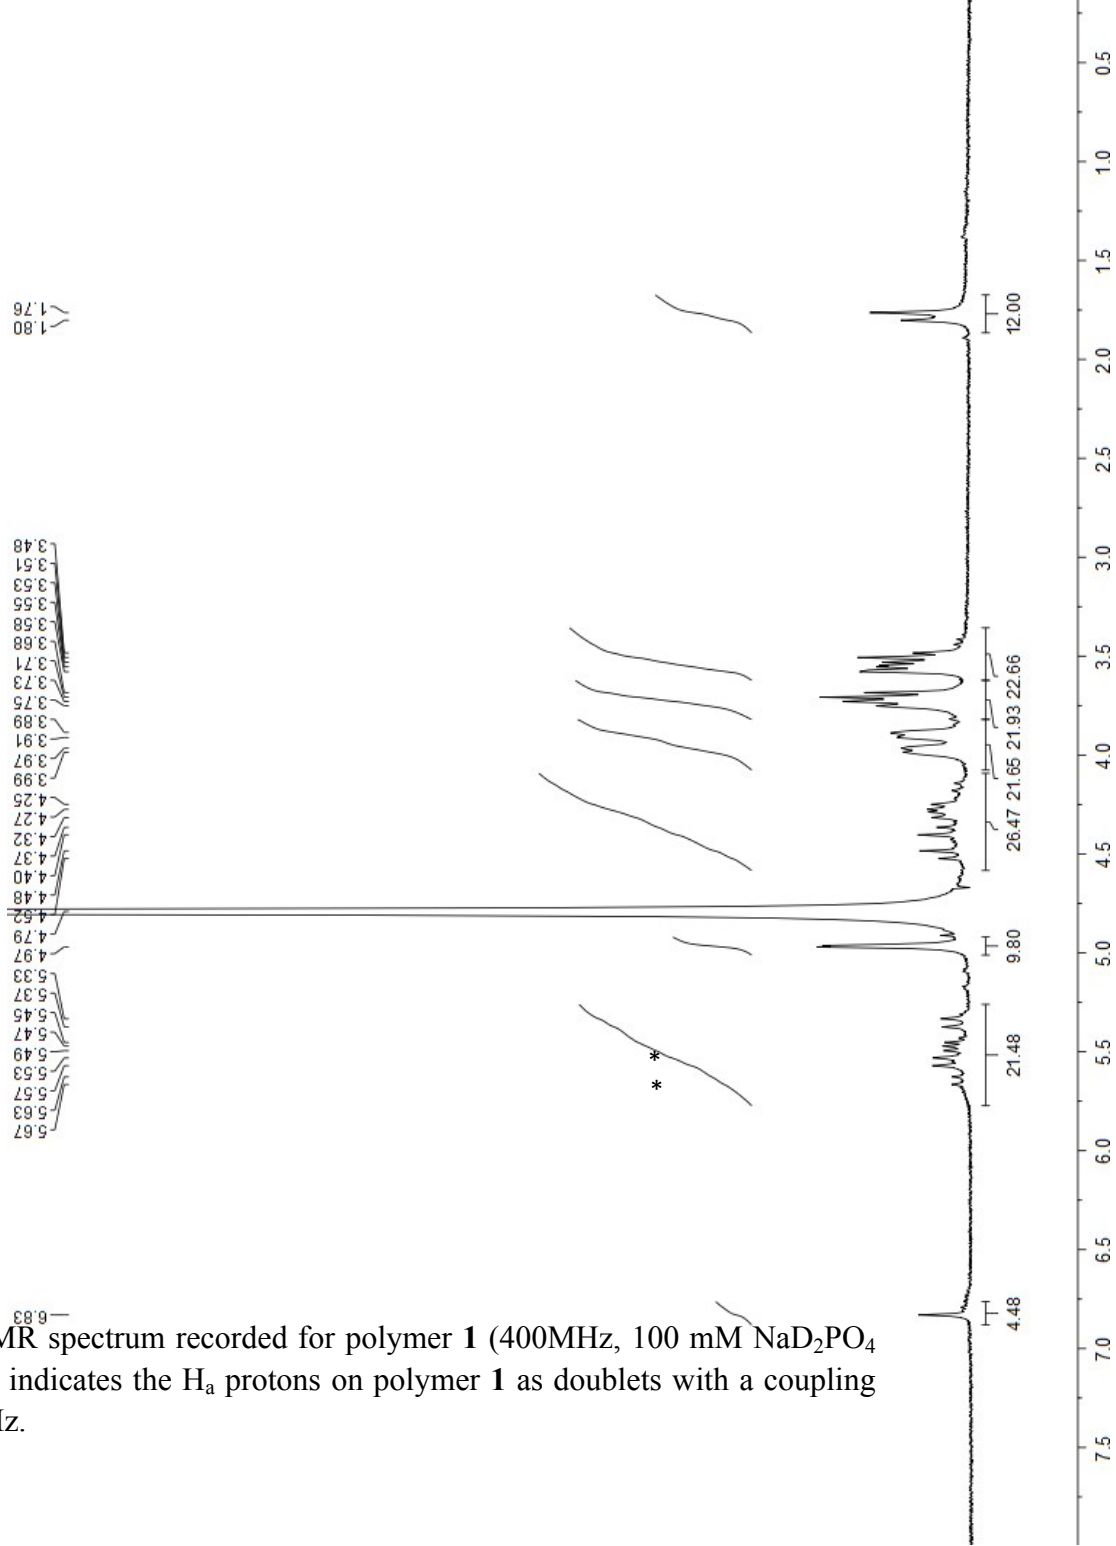

**Figure S1.**  $^1\text{H}$  NMR spectrum recorded for polymer **1** (400MHz, 100 mM  $\text{NaD}_2\text{PO}_4$  buffer, pD 7.4). \* indicates the  $\text{H}_a$  protons on polymer **1** as doublets with a coupling constant of 15.6 Hz.

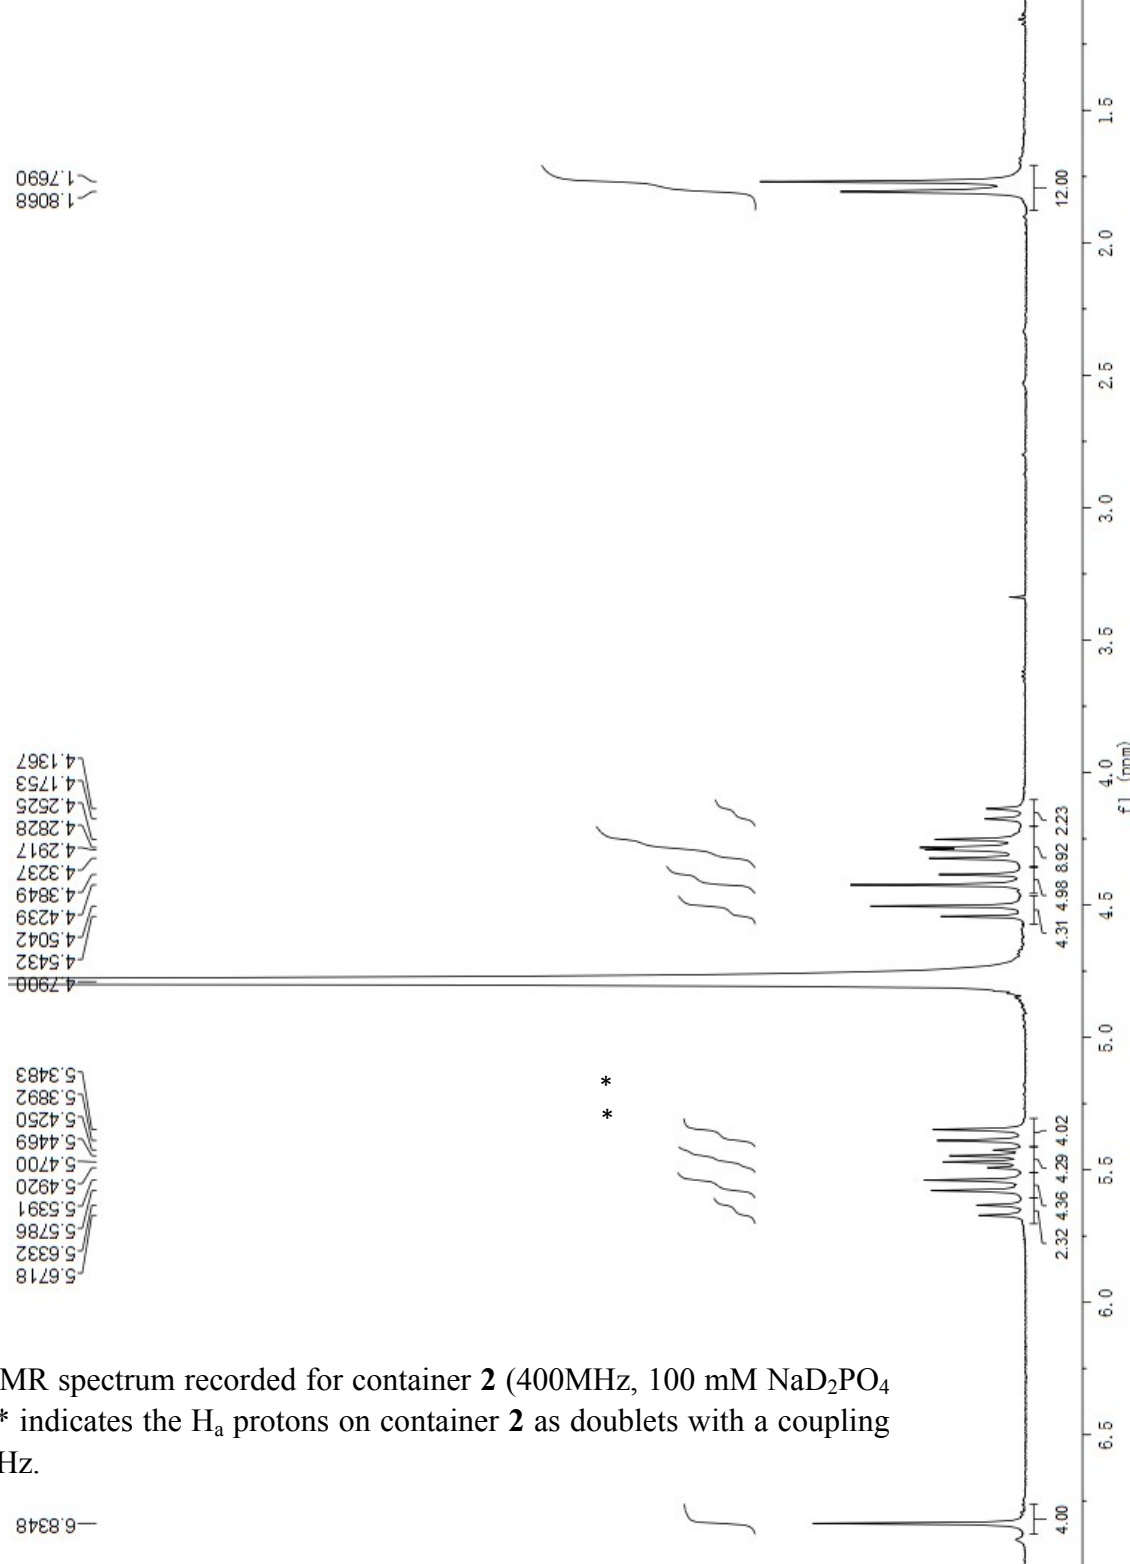

**Figure S2.**  $^1\text{H}$  NMR spectrum recorded for container **2** (400MHz, 100 mM  $\text{NaD}_2\text{PO}_4$  buffer, pD 7.4). \* indicates the  $\text{H}_a$  protons on container **2** as doublets with a coupling constant of 15.6 Hz.

## Spectra for host-guest study

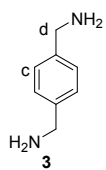

**Figure S3.**  $^1\text{H}$  NMR spectra recorded for (a) guest **3**, (b) guest **3** + polymer **1** ( $[\mathbf{3}]:[\mathbf{2}] = 2:1$ ), (c) guest **3** + polymer **1** ( $[\mathbf{3}]:[\mathbf{2}] = 1:1$ ), (d) guest **3** + polymer **1** ( $[\mathbf{3}]:[\mathbf{2}] = 1:2$ ), (e) polymer **1** in  $\text{NaD}_2\text{PO}_4$  buffer (100 mM, pD 7.4).  $[\mathbf{2}]$  represents the mole concentration of container **2** conjugated to polymer **1**.

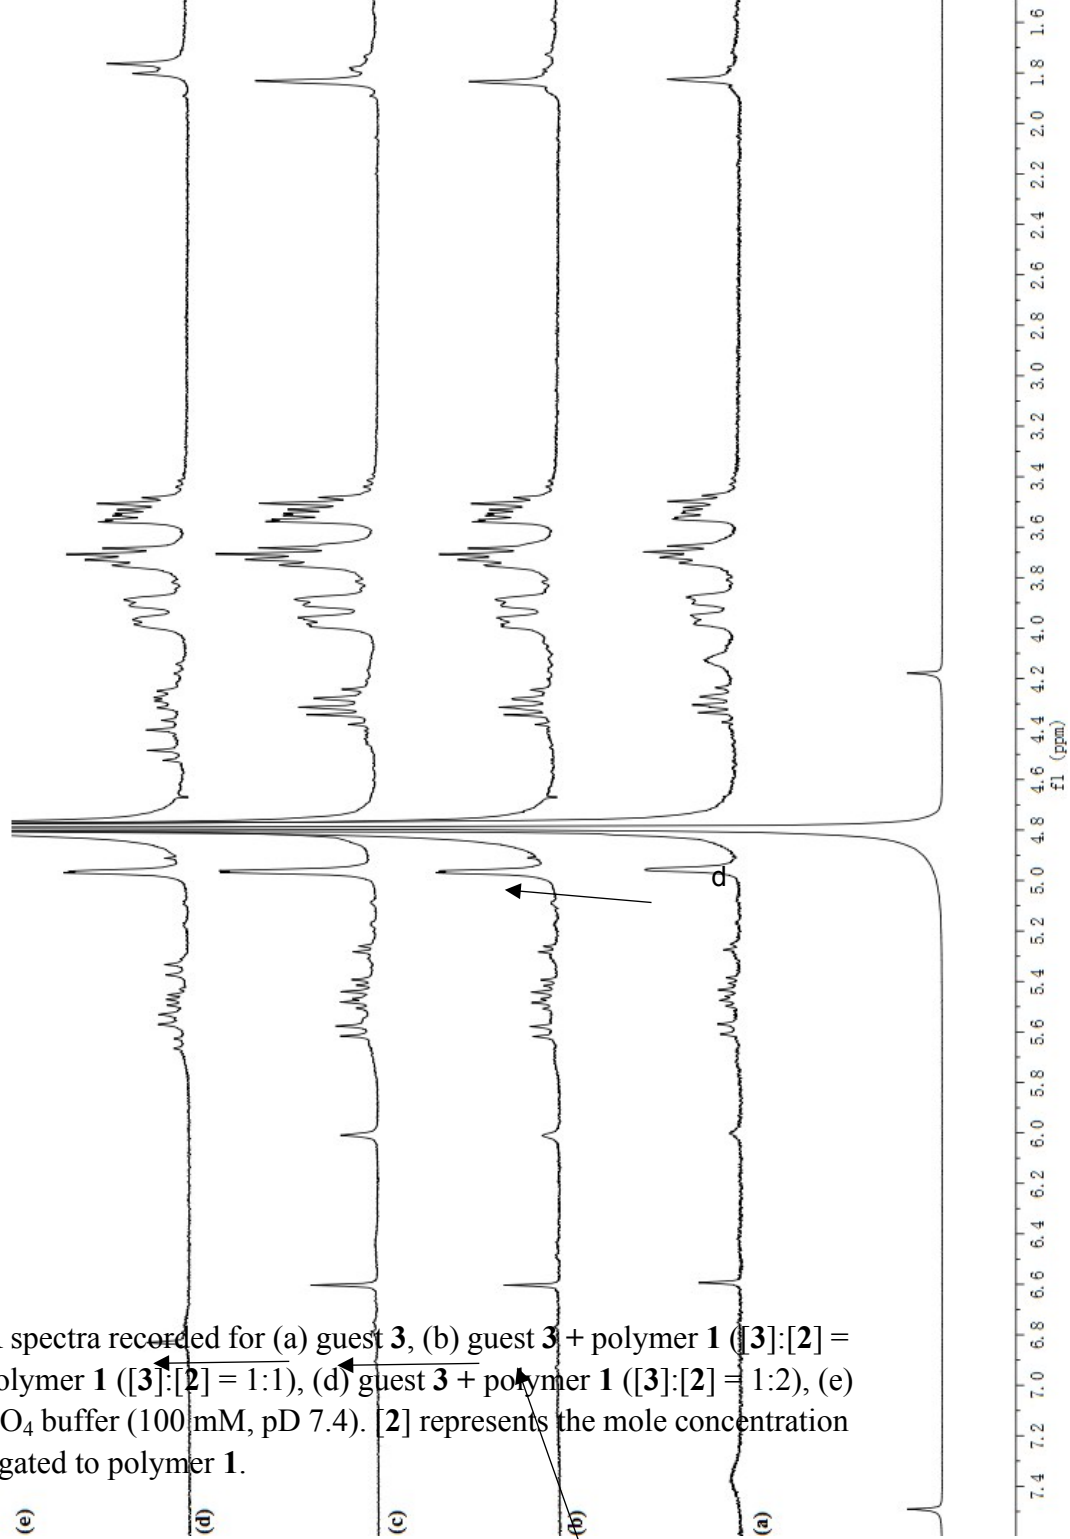

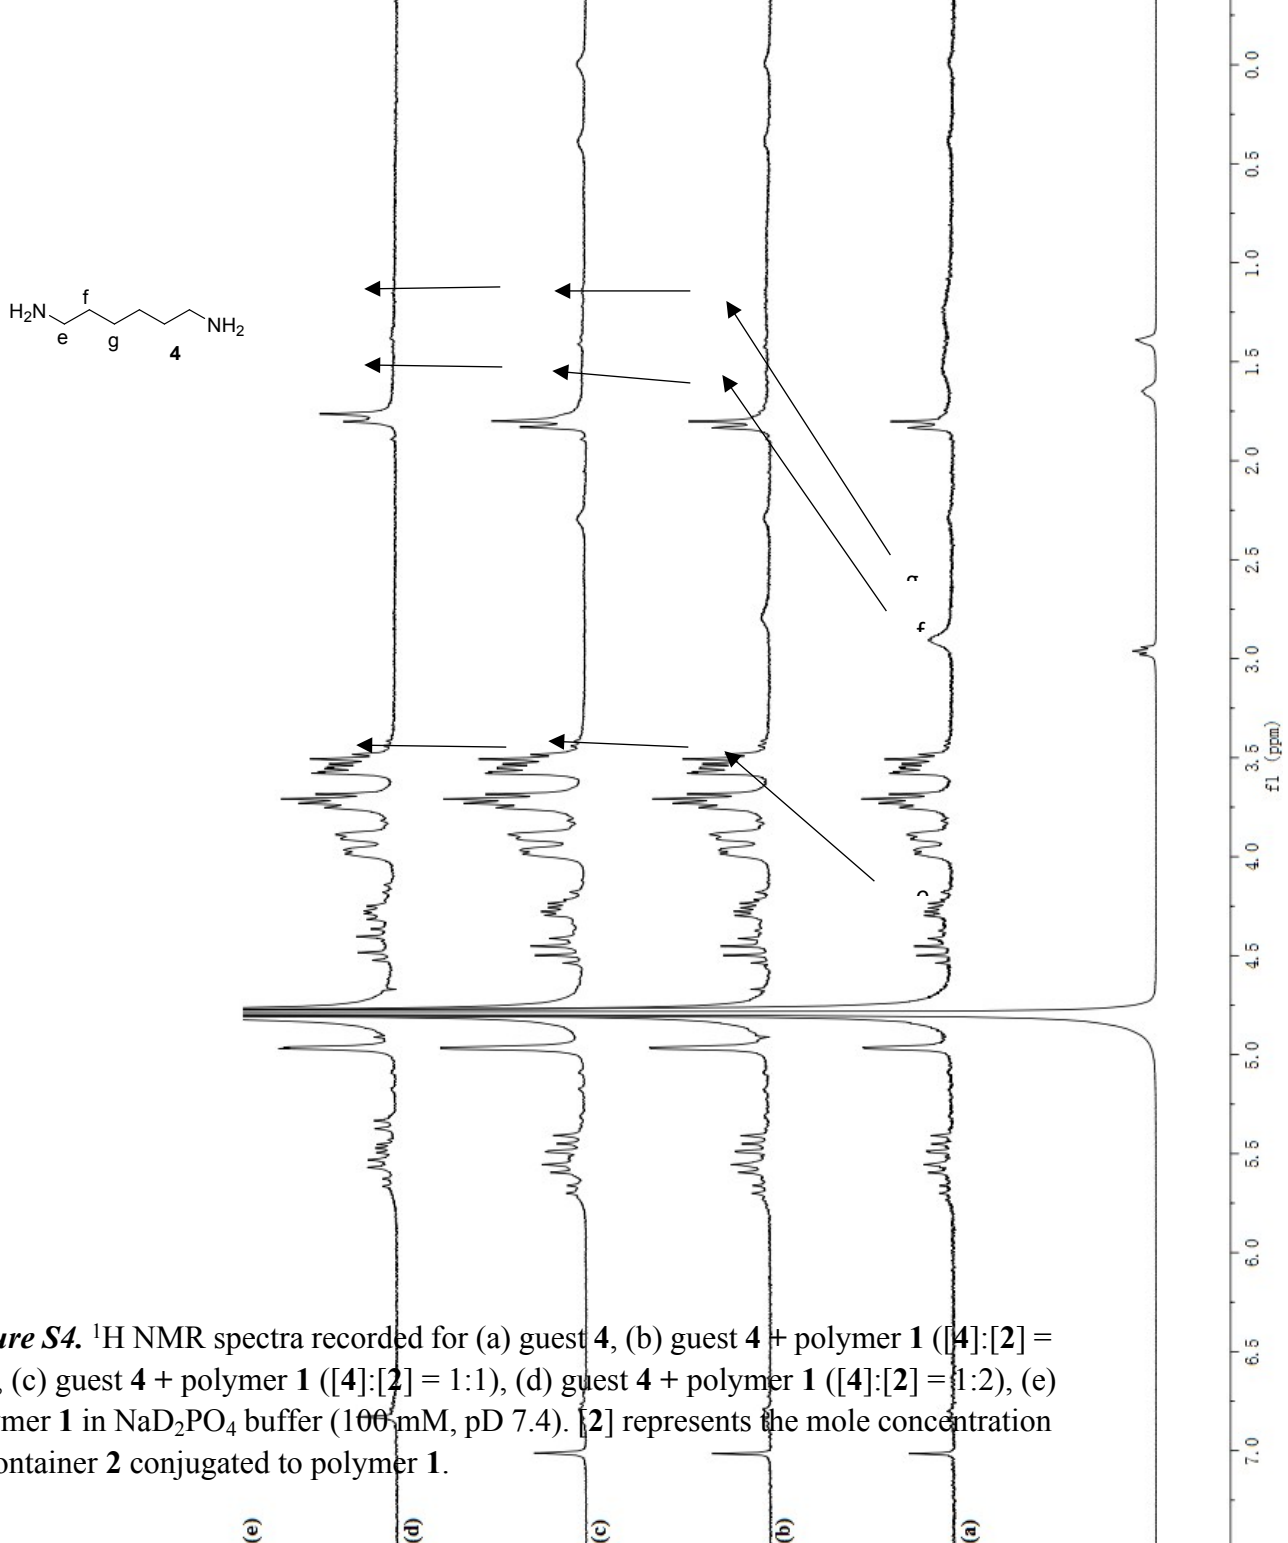

**Figure S4.** <sup>1</sup>H NMR spectra recorded for (a) guest **4**, (b) guest **4** + polymer **1** ([**4**]:[**2**] = 2:1), (c) guest **4** + polymer **1** ([**4**]:[**2**] = 1:1), (d) guest **4** + polymer **1** ([**4**]:[**2**] = 1:2), (e) polymer **1** in NaD<sub>2</sub>PO<sub>4</sub> buffer (100 mM, pD 7.4). [**2**] represents the mole concentration of container **2** conjugated to polymer **1**.

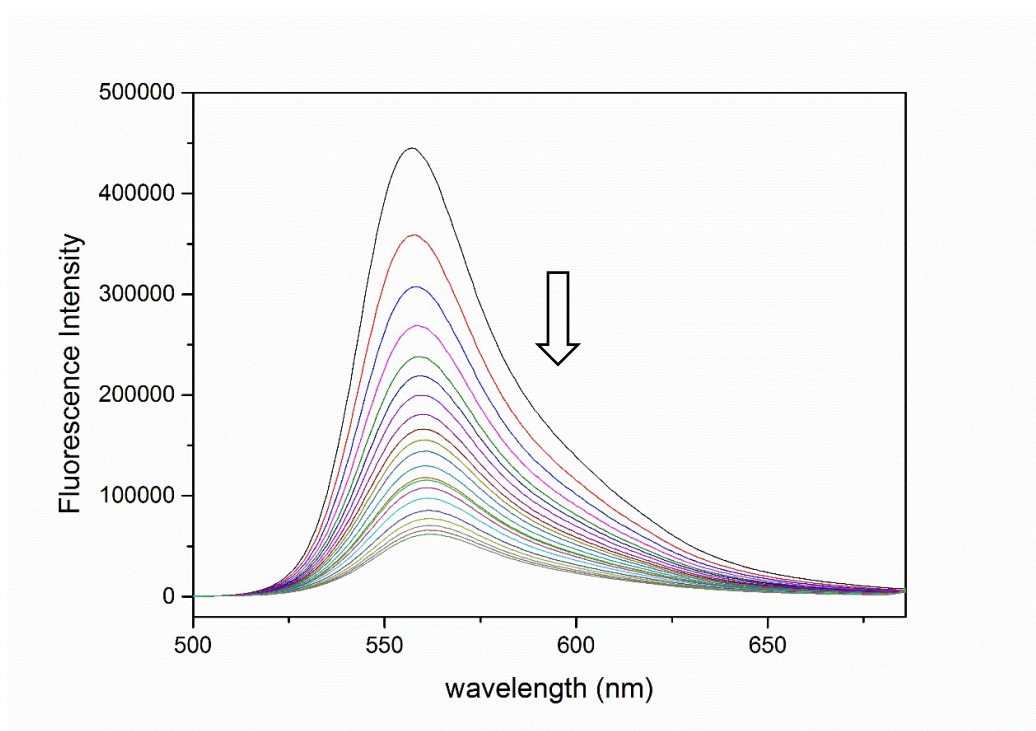

(B)

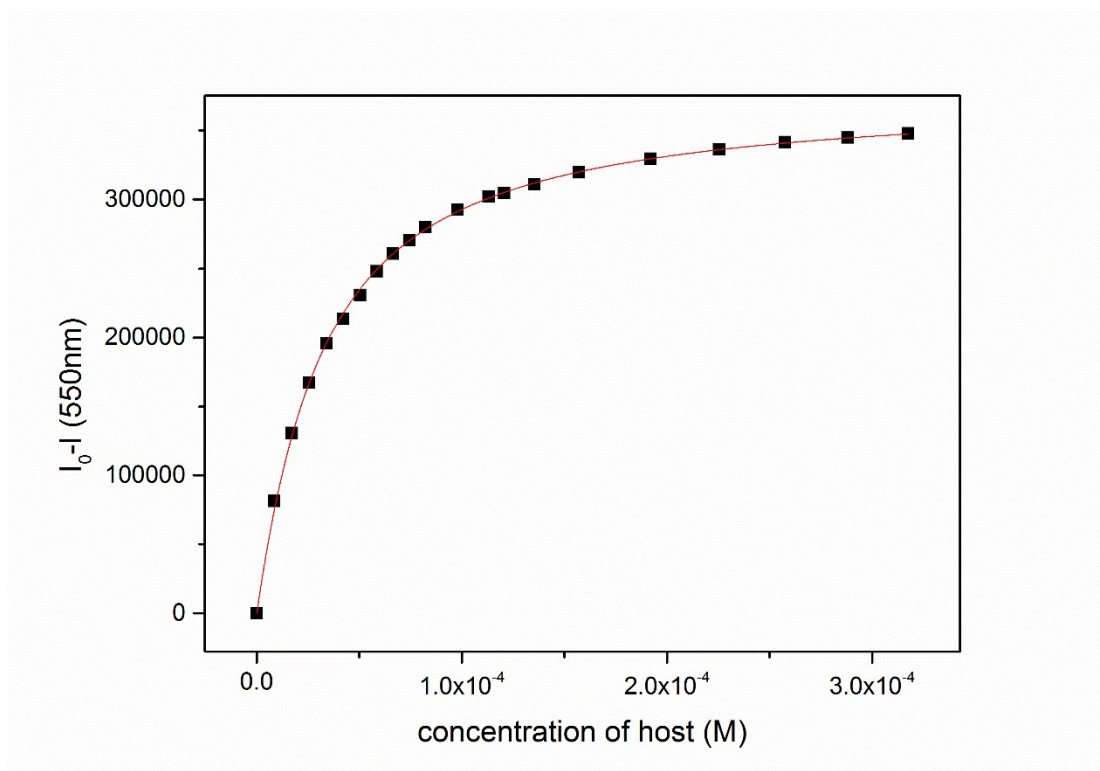

**Figure S5.** (A) fluorescence spectra from the titration of dye **5** (10  $\mu\text{M}$ ) with polymer **1** (calculated for container **2** concentration, 0 – 317  $\mu\text{M}$ ) in 10 mM  $\text{NaH}_2\text{PO}_4$  buffer (pH =7.4,  $\lambda_{\text{ex}} = 350 \text{ nm}$ ); (B) plot of  $I_0-I$  (550 nm) as a function of container **2** concentration. The solid line represents the best non-linear fitting of the data to a 1:1 binding model ( $K_a = (3.7 \pm 0.1) \times 10^4 \text{ M}^{-1}$ )

(A)



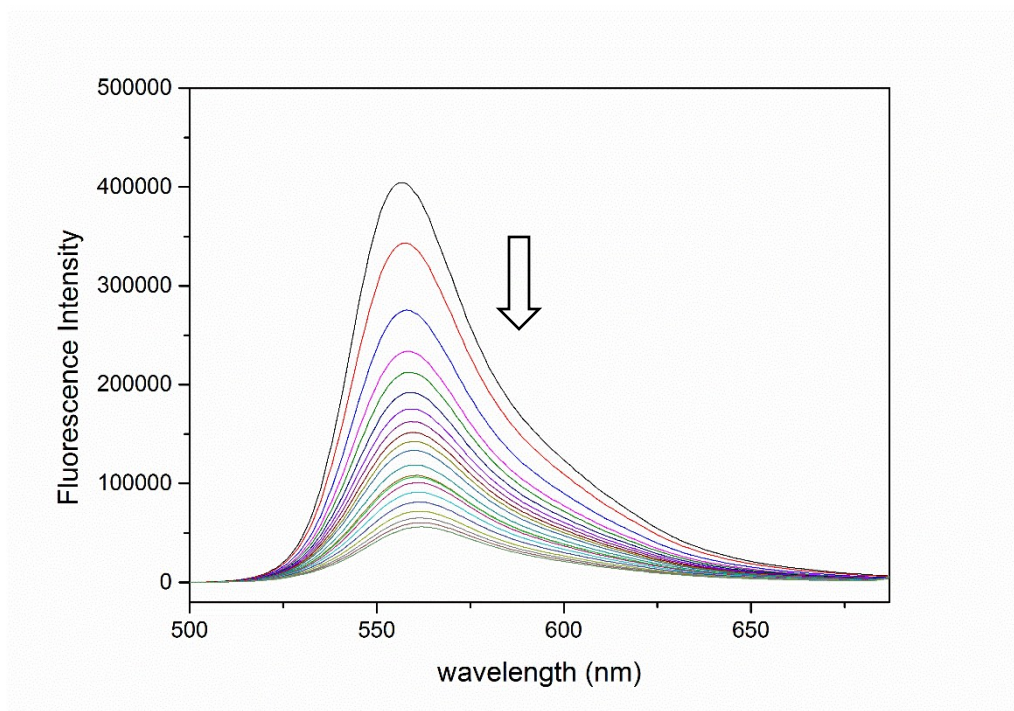

(B)

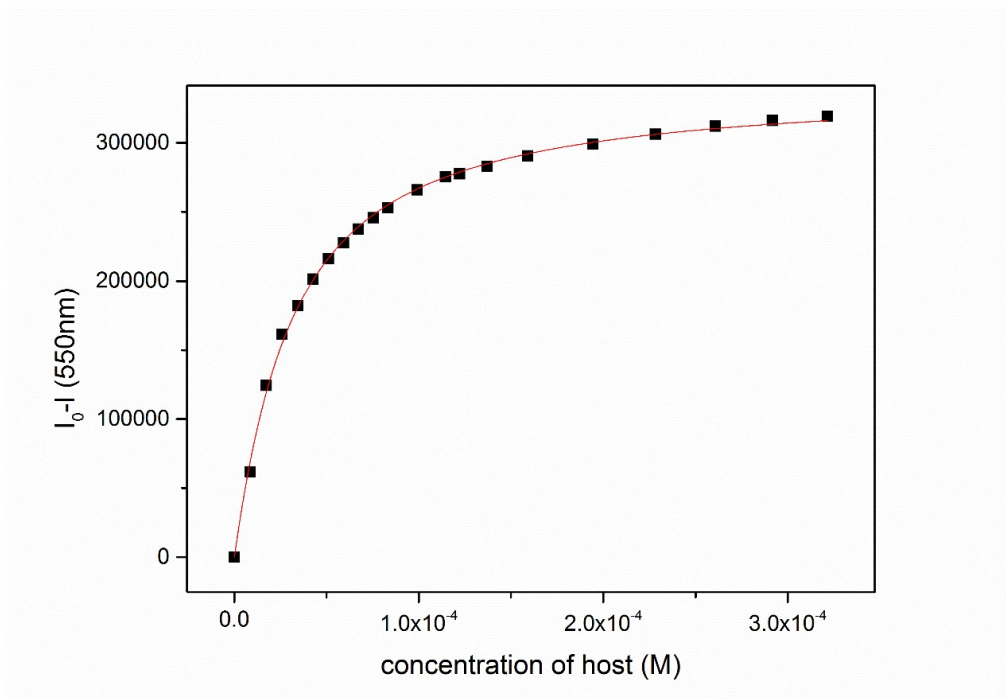

**Figure S6.** (A) fluorescence spectra from the titration of dye **5** ( $10 \mu\text{M}$ ) with container **2** ( $0 - 312 \mu\text{M}$ ) in  $10 \text{ mM NaH}_2\text{PO}_4$  buffer ( $\text{pH} = 7.38$ ,  $\lambda_{\text{ex}} = 350 \text{ nm}$ ); (B) plot of  $I_0 - I$  ( $550 \text{ nm}$ ) as a function of **2** concentration. The solid line represents the best non-linear fitting of the data to a 1:1 binding model ( $K_a = (3.8 \pm 0.1) \times 10^4 \text{ M}^{-1}$ )

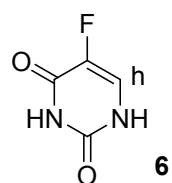

**Figure S7.**  $^1\text{H}$  NMR spectrum (400 MHz, 10 mM  $\text{D}_2\text{O}/\text{NaD}_2\text{PO}_4$ ,  $\text{pD} = 7.4$ ) recorded for a solution of drug **6** ( $100\ \mu\text{M}$ ) and polymer **1** of varied concentrations (calculated for container **2** concentration, 0 – 15 mM). Arrows indicate the upfield shift of  $\text{H}_b$ .

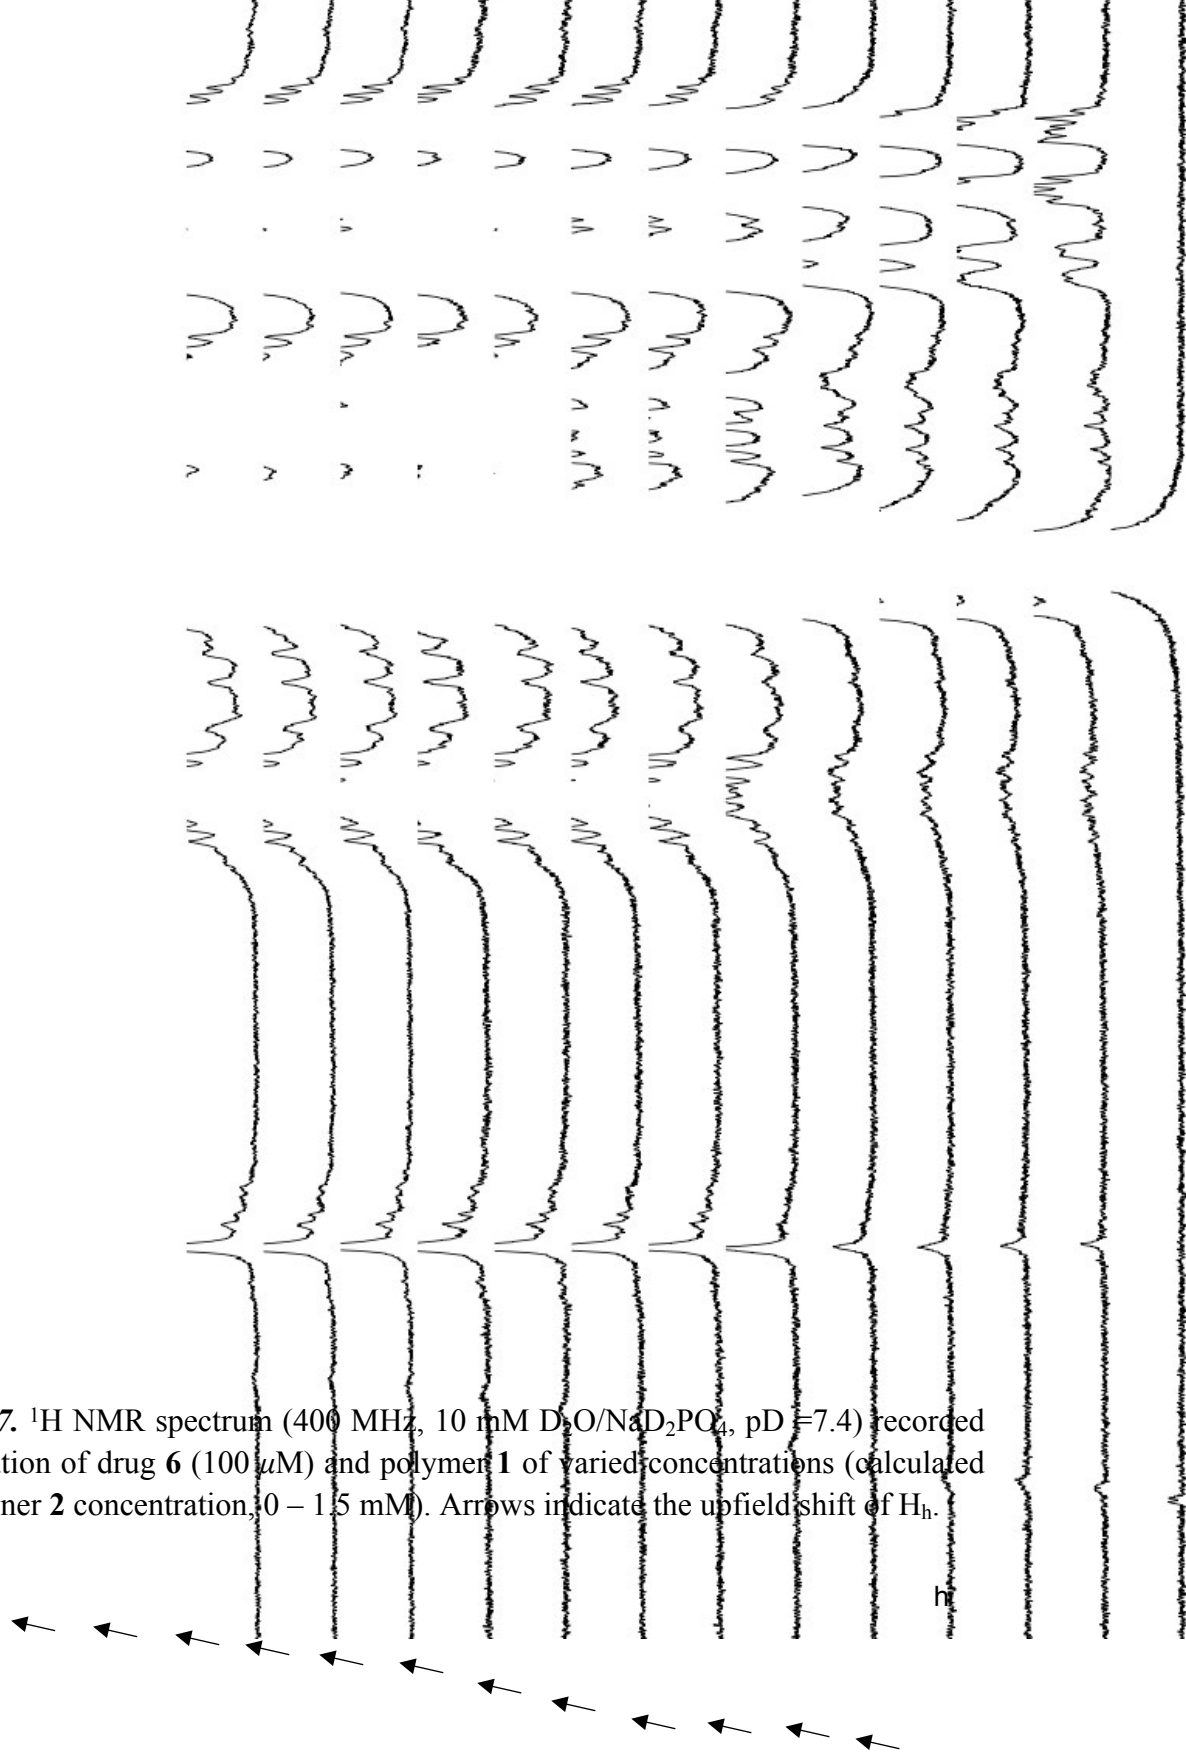

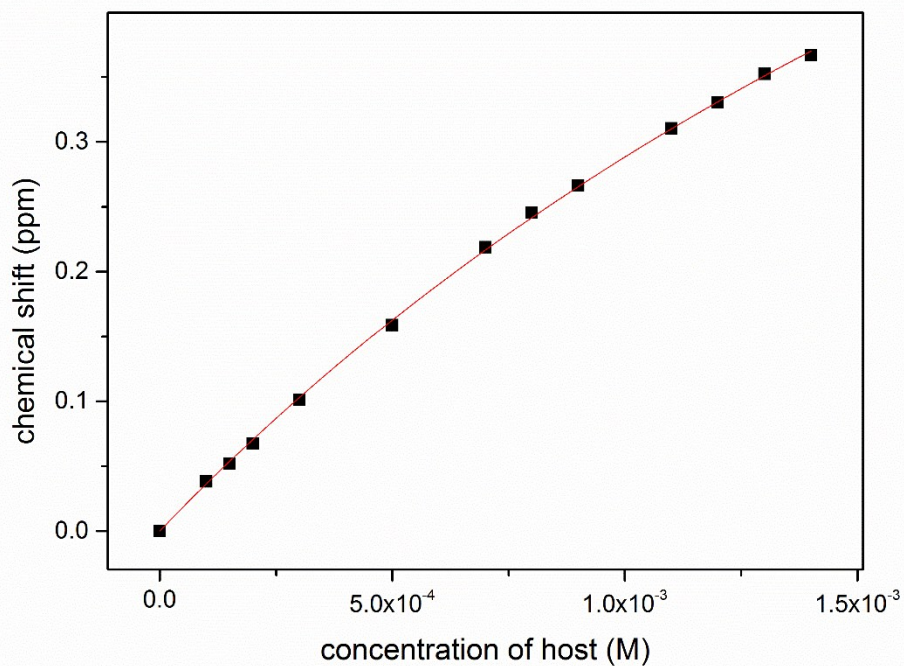

**Figure S8.** Plot of the chemical shift of H<sub>g</sub> resonance on drug **6** as a function of container **2** (conjugated to polymer **1**) concentration. The solid line represents the best non-linear fitting of data to a 1:1 binding model ( $K_a = (3.0 \pm 0.2) \times 10^2 \text{ M}^{-1}$ ).

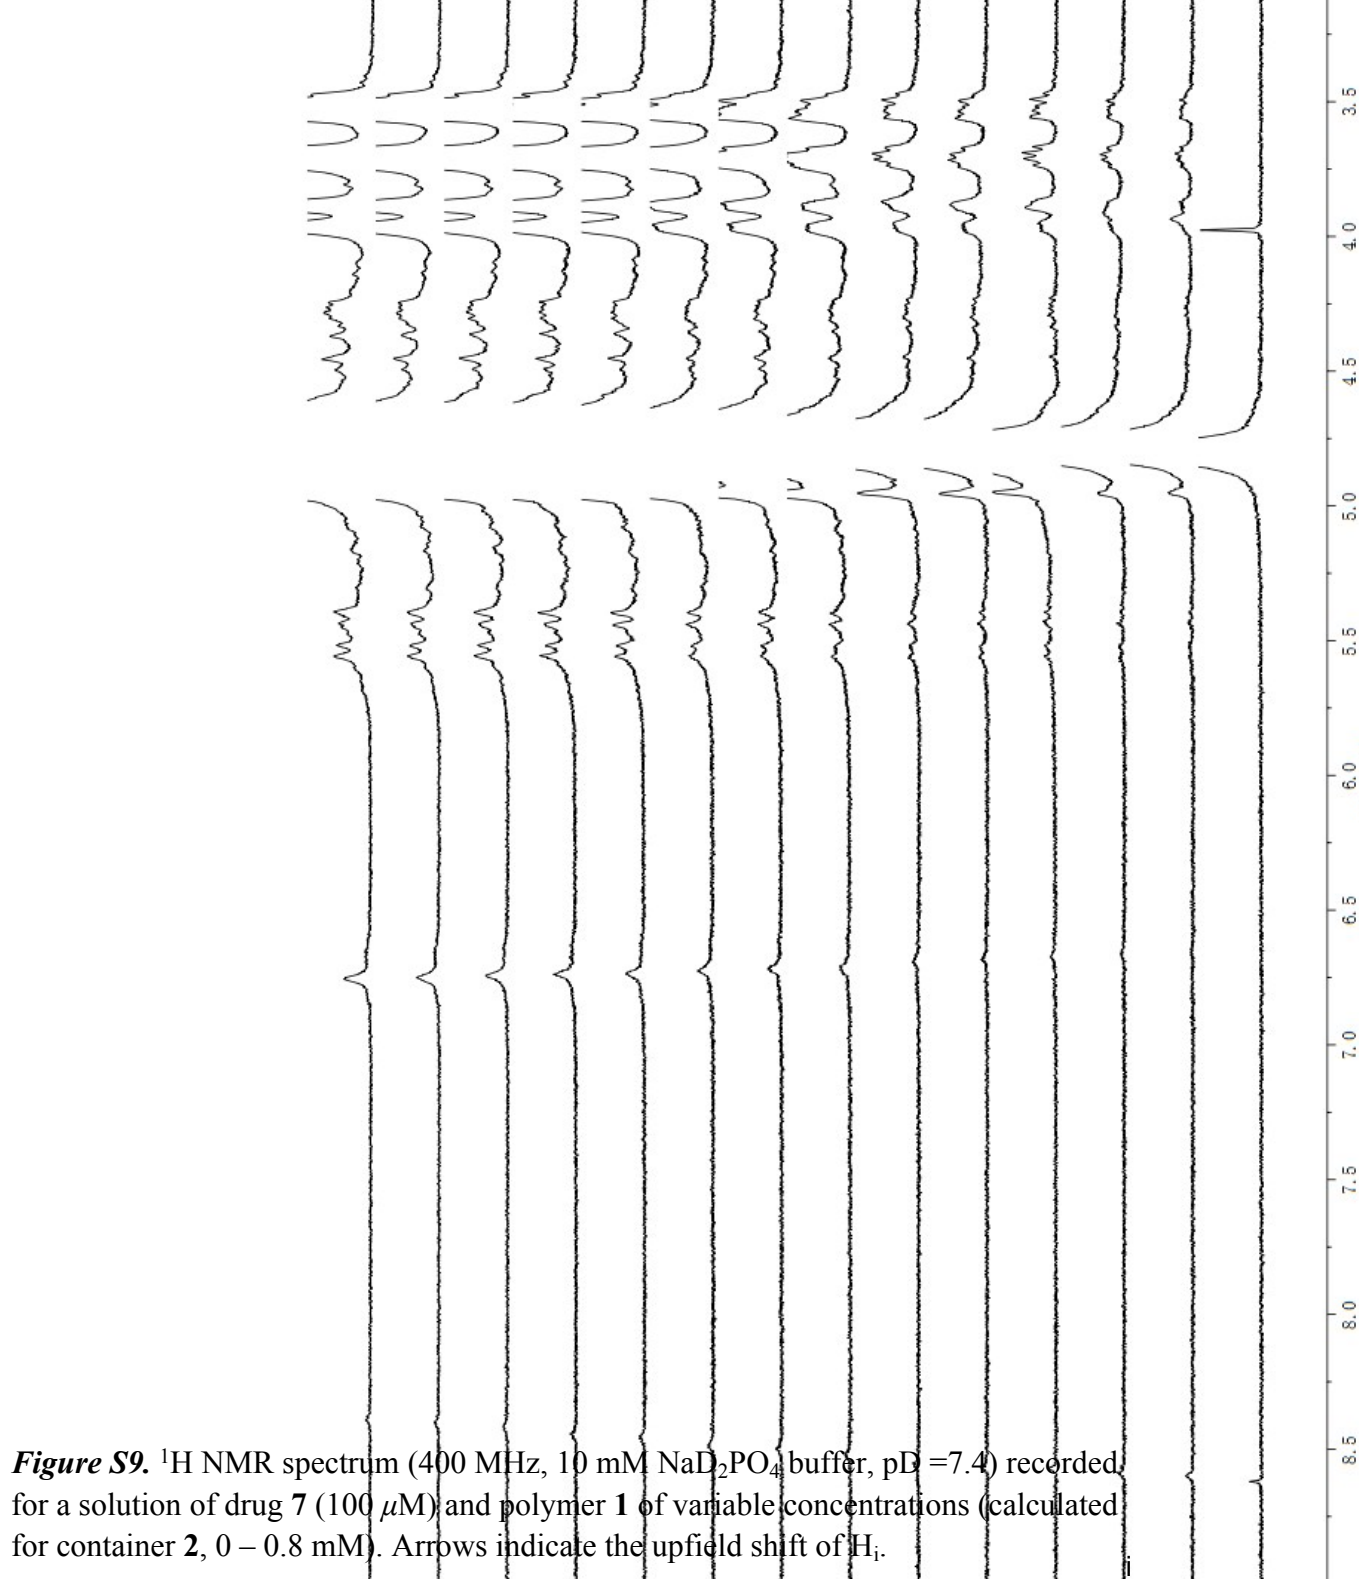

**Figure S9.** <sup>1</sup>H NMR spectrum (400 MHz, 10 mM NaD<sub>2</sub>PO<sub>4</sub> buffer, pD =7.4) recorded for a solution of drug **7** (100 μM) and polymer **1** of variable concentrations (calculated for container **2**, 0 – 0.8 mM). Arrows indicate the upfield shift of H<sub>i</sub>.

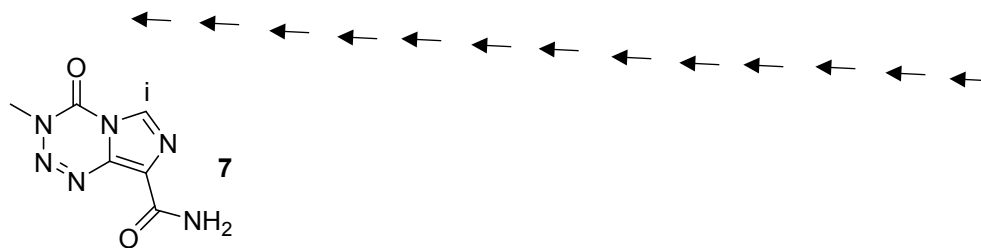

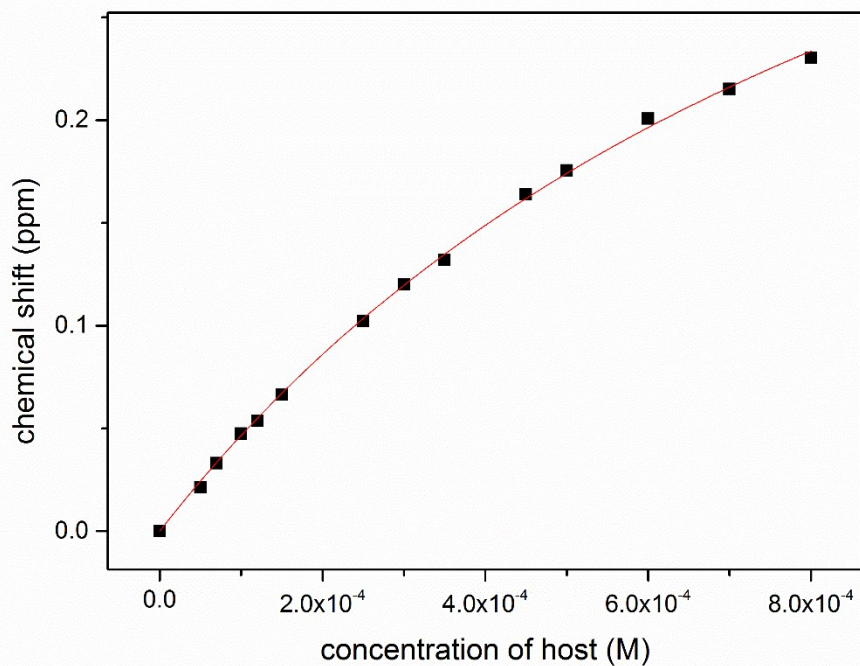

**Figure S10.** Plot of the chemical shift of H<sub>i</sub> resonance on drug **7** as a function of container **2** (conjugated to polymer **1**) concentration. The solid line represents the best non-linear fitting of data to a 1:1 binding model ( $K_a = (1.0 \pm 0.1) \times 10^3 \text{ M}^{-1}$ )



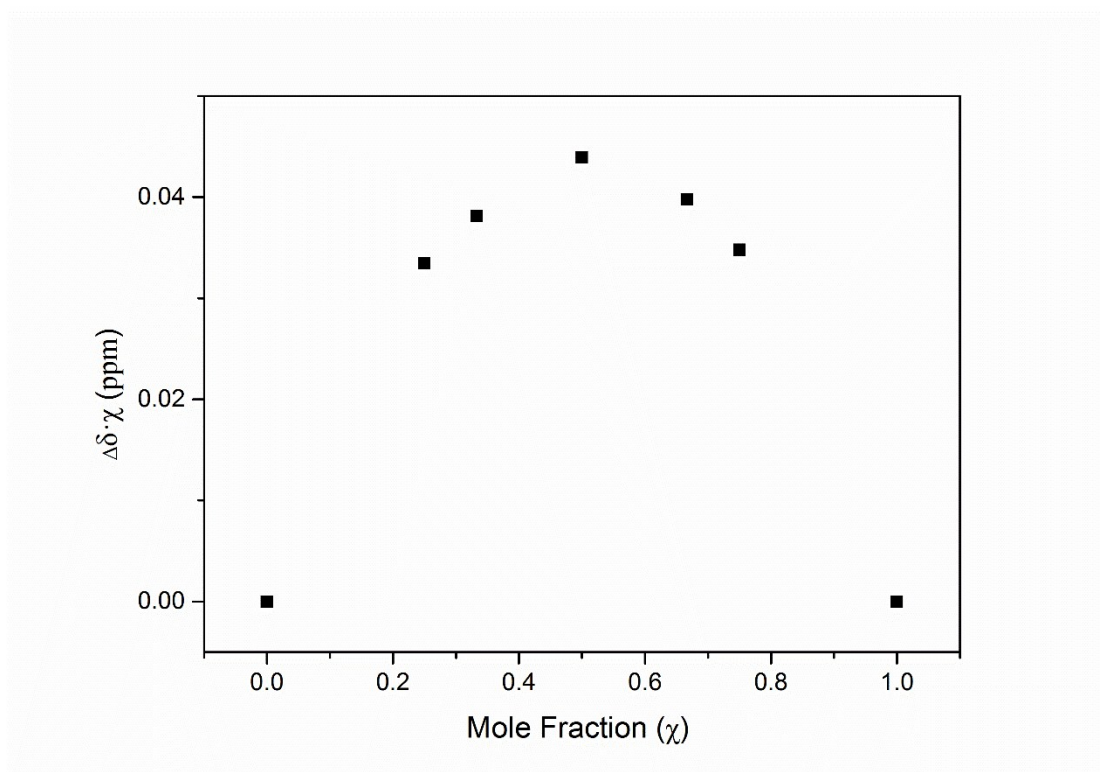

**Figure S11.** Job plot for drug **6** and polymer **1** ( $[\mathbf{6}] + [\text{container } \mathbf{2}] = 500 \mu\text{M}$ , 10 mM  $\text{NaD}_2\text{PO}_4$  buffer,  $\text{pD} = 7.4$ ) of mole fraction ( $\chi$ ) of **6** versus  $\Delta\delta \cdot \chi$ . The plot indicates a 1:1 binding stoichiometry.

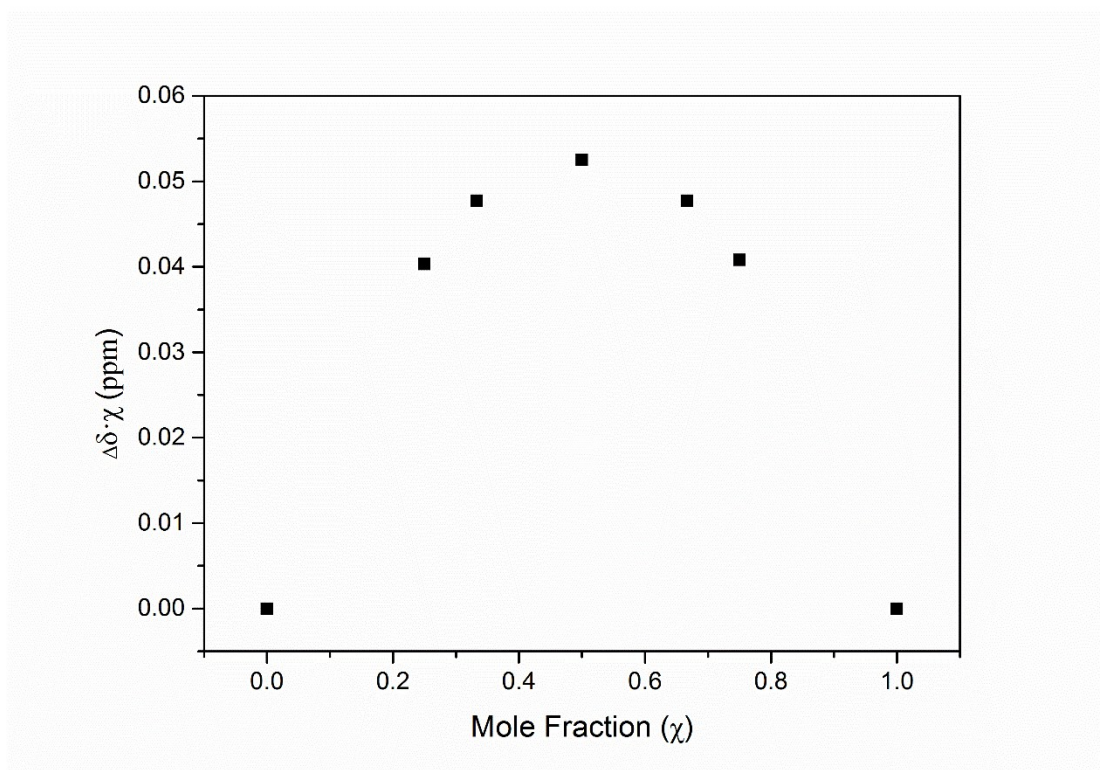

**Figure S12.** Job plot for drug **7** and polymer **1** ( $[\mathbf{7}] + [\text{container } \mathbf{2}] = 500 \mu\text{M}$ , 10 mM  $\text{NaD}_2\text{PO}_4$  buffer,  $\text{pD} = 7.4$ ) of mole fraction ( $\chi$ ) of **7** versus  $\Delta\delta \cdot \chi$ . The plot indicates a 1:1 binding stoichiometry.

**Figure S13.**  $^1\text{H}$  NMR spectra recorded for (a) guest **8**, (b) guest **8** + polymer **1** ( $[\mathbf{8}]:[\mathbf{2}] = 2:1$ ), (c) guest **8** + polymer **1** ( $[\mathbf{8}]:[\mathbf{2}] = 1:1$ ), (d) guest **8** + polymer **1** ( $[\mathbf{8}]:[\mathbf{2}] = 1:2$ ), (e) polymer **1** in  $\text{NaD}_2\text{PO}_4$  buffer (10 mM, pD 7.4).  $[\mathbf{2}]$  represents the mole concentration of container **2** conjugated to polymer **1**. Arrows indicate the upfield shift of  $\text{H}_j$ .

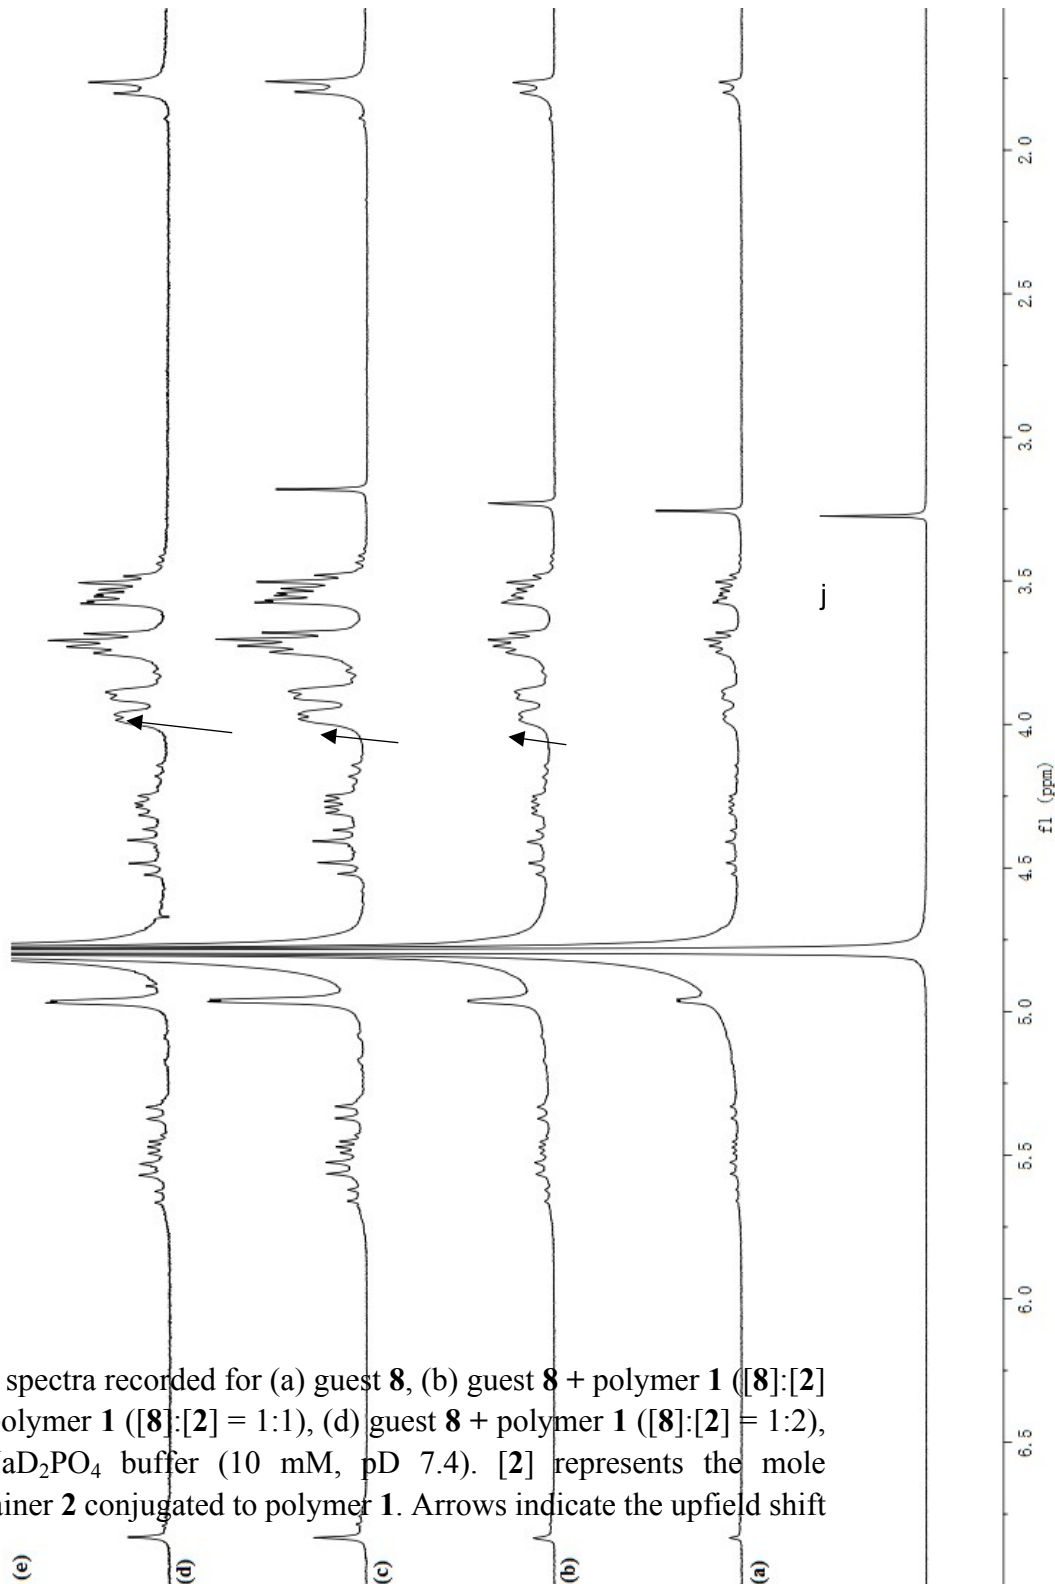

**Supplementary TEM image**

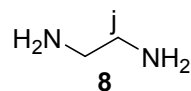

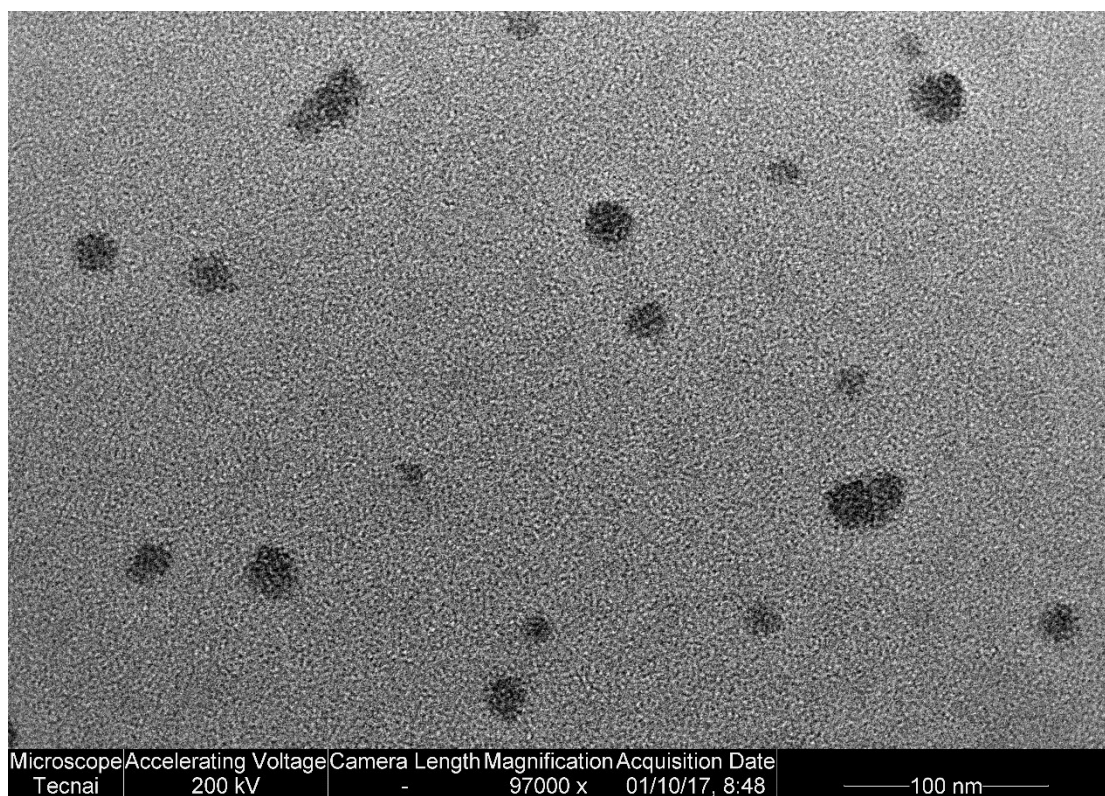

**Figure S14.** TEM image of 0.3 mg/mL polymer **1** and 0.6 mg/mL PEI in water after lyophilization.

## **Method for quantum yield determination**



A comparative method<sup>2</sup> was used to determine quantum yield  $\Phi_F$  by using a standard samples with known  $\Phi_F$  value. Here we choose quinine sulfate as the standard samples in 0.1 M H<sub>2</sub>SO<sub>4</sub>. For the measurement, standard and test samples were prepared in a 10 mm cuvette with an absorbance of 0.024 at 350 nm.  $\lambda_{\text{ex}} = 350$  nm, slit width: 5 nm/5 nm. Quantum yield was calculated according to the following equation:

$$\Phi_X = \Phi_S \left( \frac{A_S}{A_X} \cdot \frac{I_X}{I_S} \right) \left( \frac{n_X}{n_S} \right)^2$$

where subscripts  $X$  and  $S$  refer to test sample and standard sample, respectively;  $\Phi$  represents the quantum yield;  $A$  represents the absorbance;  $I$  represents the integrated fluorescence intensity from corrected fluorescence spectra (400-600 nm);  $n$  represents the refractive index of the solution ( $n = 1.33$  for dilute aqueous solution);  $\Phi_S$  is 0.55 based on literature report.<sup>3</sup>

## Solid phase luminescence

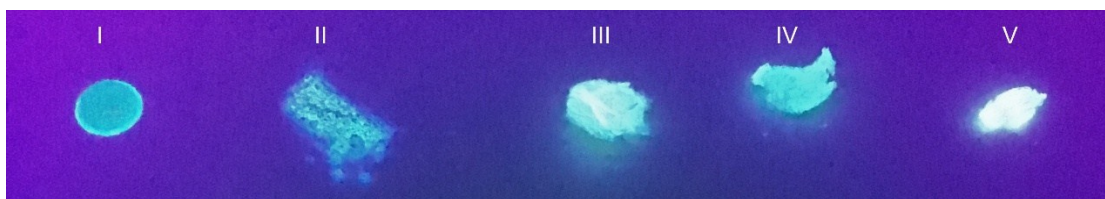

**Figure S15.** Luminescence images of PEI (I), dextran (II), polymer **1** (III), lyophilized mixture of dextran and PEI (IV), lyophilized mixture of polymer **1** and PEI (V) under UV irradiation (365 nm).

## ***In vitro* cytotoxicity assay**

The cytotoxicity of polymer **1** and PEI was examined by CCK-8 assay with HeLa cells. HeLa cells were seeded in 96-plate wells (4000 cells/well) and cultured for 12 h. Then, the cells were treated with fresh medium (100  $\mu$ L/well) containing polymer **1** alone, polymer **1** and PEI, or PEI alone at varied concentrations. After 24 h, CCK-8 solution (10  $\mu$ L) was added to each well. After 3 h incubation, the absorbance was measured at 450 nm by a Microplate Reader (Biotek Synergy H1). The relative cell viability was calculated against blank (medium treated HeLa cells).

## **Bioimaging by confocal microscopy**

Confocal laser scanning microscopic images were performed on an Olympus FV1000 confocal microscope with a 60  $\times$  oil-immersion objective lens. Cells were plated on 20 mm glass culture dish and were incubated overnight. The cells were washed with PBS and then incubated with polymer **1** (0.1 mg/mL) and PEI (0.033 mg/mL) for 10 h at 37  $^{\circ}$ C. After washing three times with PBS, the cells were imaged by confocal microscopy with the excitation wavelength at 405 nm.

## References

- (1) Ma, D.; Zavalij, P. Y.; Isaacs, L. *J. Org. Chem.* **2010**, *75*, 4786–4795.
- (2) Williams, A. T. R.; Winfield, S. A.; Miller, J. N. *Analyst* **1983**, *108*, 1067–1071.
- (3) Melhush, W. H. *J. Phy. Chem.*, **1961**, *65*, 229-235.
